# Supplementary material for: Shining a light on the impact of antifungals on Aspergillus fumigatus subcellular dynamics through fluorescence imaging
Source: Antimicrob Agents Chemother. 2024 Oct 15;68(11):e00803-24. doi: 10.1128/aac.00803-24 (PMC11539212; doi:10.1128/aac.00803-24)
Supplement: Supplemental figures — Figures S1 to S5. [file aac.00803-24-s0001.pdf]

a

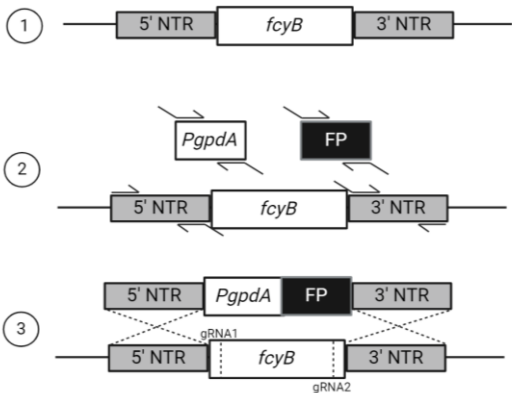

b

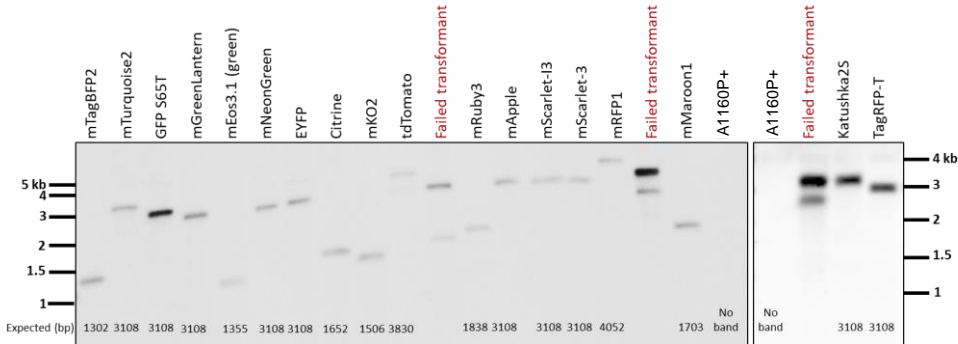

c

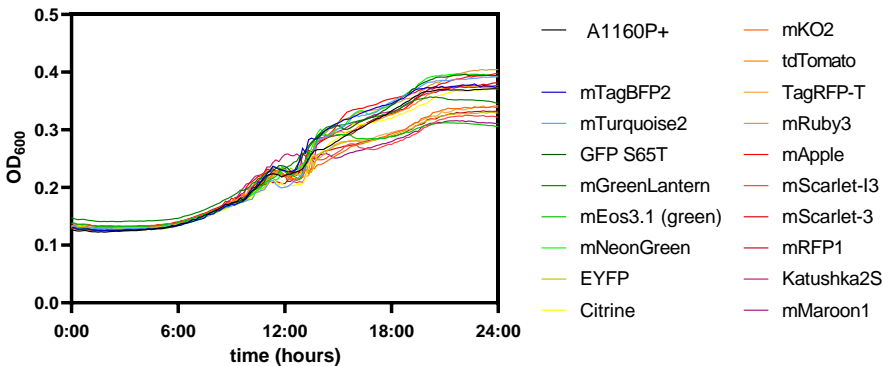

**Figure S1.** (a) Schematic of Fusion PCR mediated generation of knock-in constructs targeting the *fcyB* locus. The *PgpdA*, FP, and 5' and 3' nontranslated regions (NTRs) are amplified from plasmid DNA and genomic DNA. Both NTRs, *PgpdA*, and FP contain overlapping DNA (grey line) for subsequent connection via fusion PCR, yielding the knock-in constructs. Either HDR-mediated or CRISPR-Cas9-mediated (using gRNAs targeted dotted line regions) facilitate transformation. (b) Southern blot analysis for single copy FP cassette integrations. Expected band sizes are indicated. (c) Liquid growth rates of *PgpdA*-driven FP constructs. 5  $\mu$ L of a  $1 \times 10^5$  spores/mL solution of each strain were inoculated in liquid AMM, pH 7. Microdilution plates were incubated for 24 h at 37  $^{\circ}$ C with OD<sub>600</sub> measurements captured every 10 minutes. Growth rates were calculated as the slope of growth between 12-18 hours. These were compared by a one-way ANOVA.

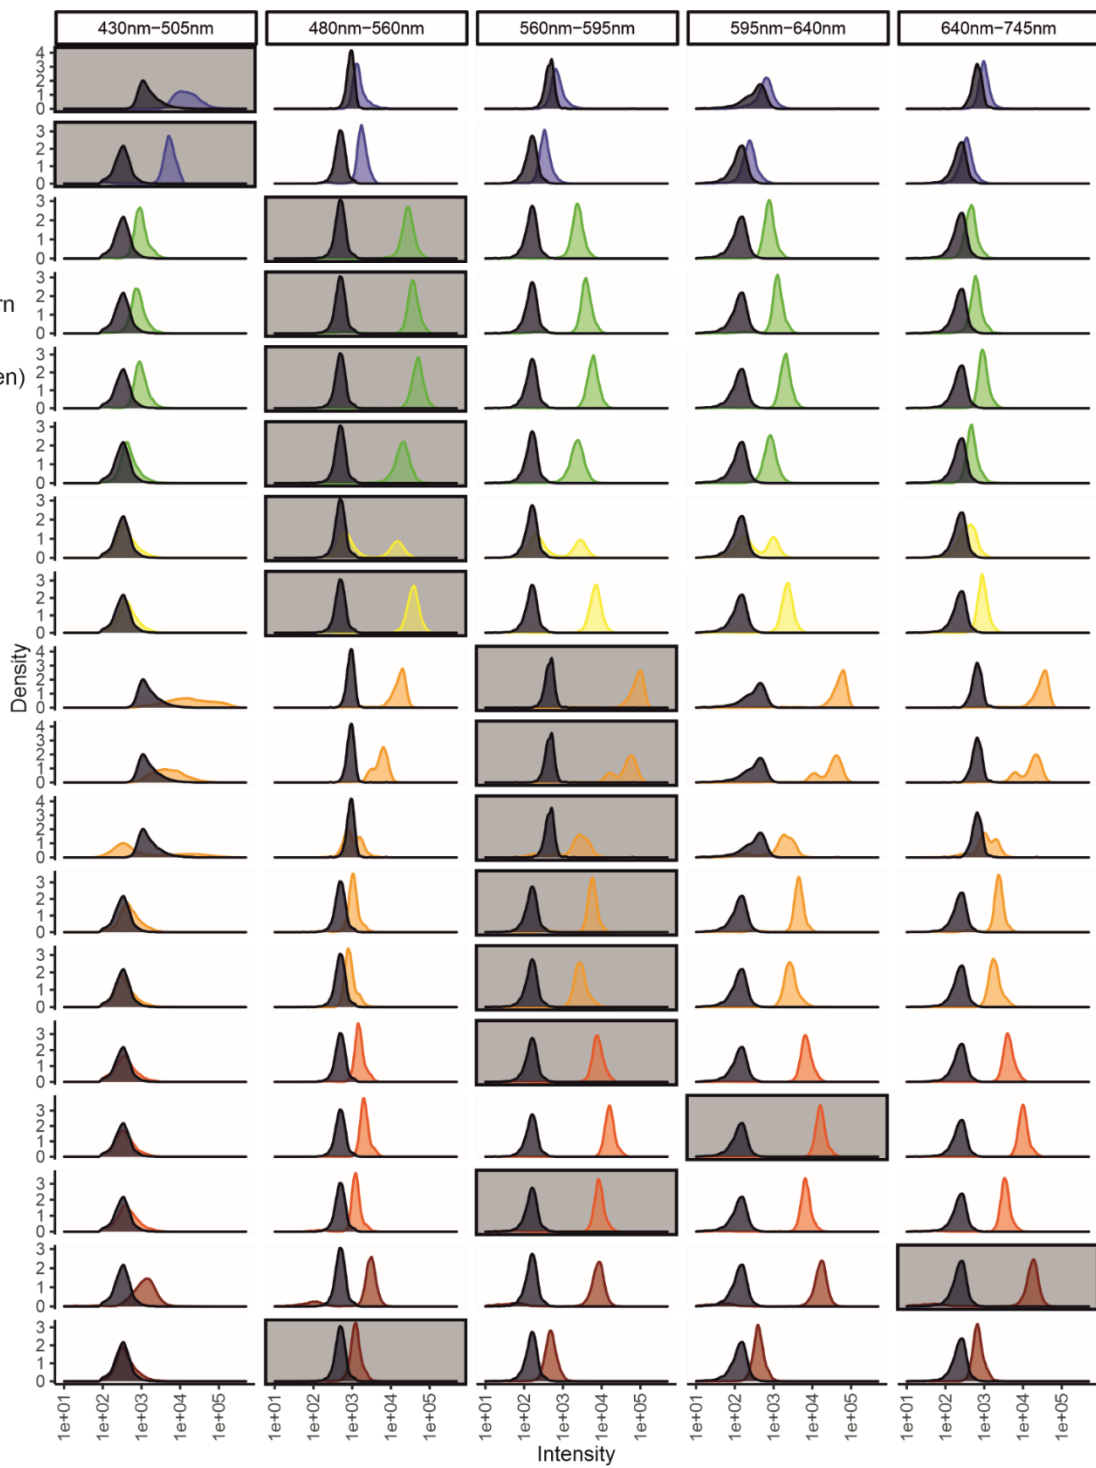

**Figure S2.** Brightness of 18 fluorescent proteins in spores using imaging flow cytometry. Population density plots faceted by an emission bandpass filter and fluorescent protein. Densities shown in grey represent wild-type A1160P+ (WT) population emissions. Strains expressing mTagBFP2, mKO2, tdTomato and TagRFP-T were conducted in a separate experiment with separate internal WT control. Density plots with the greatest difference between the median fluorescent intensity of the WT strain and fluorophore-expressing strain are highlighted for each fluorescent protein.#

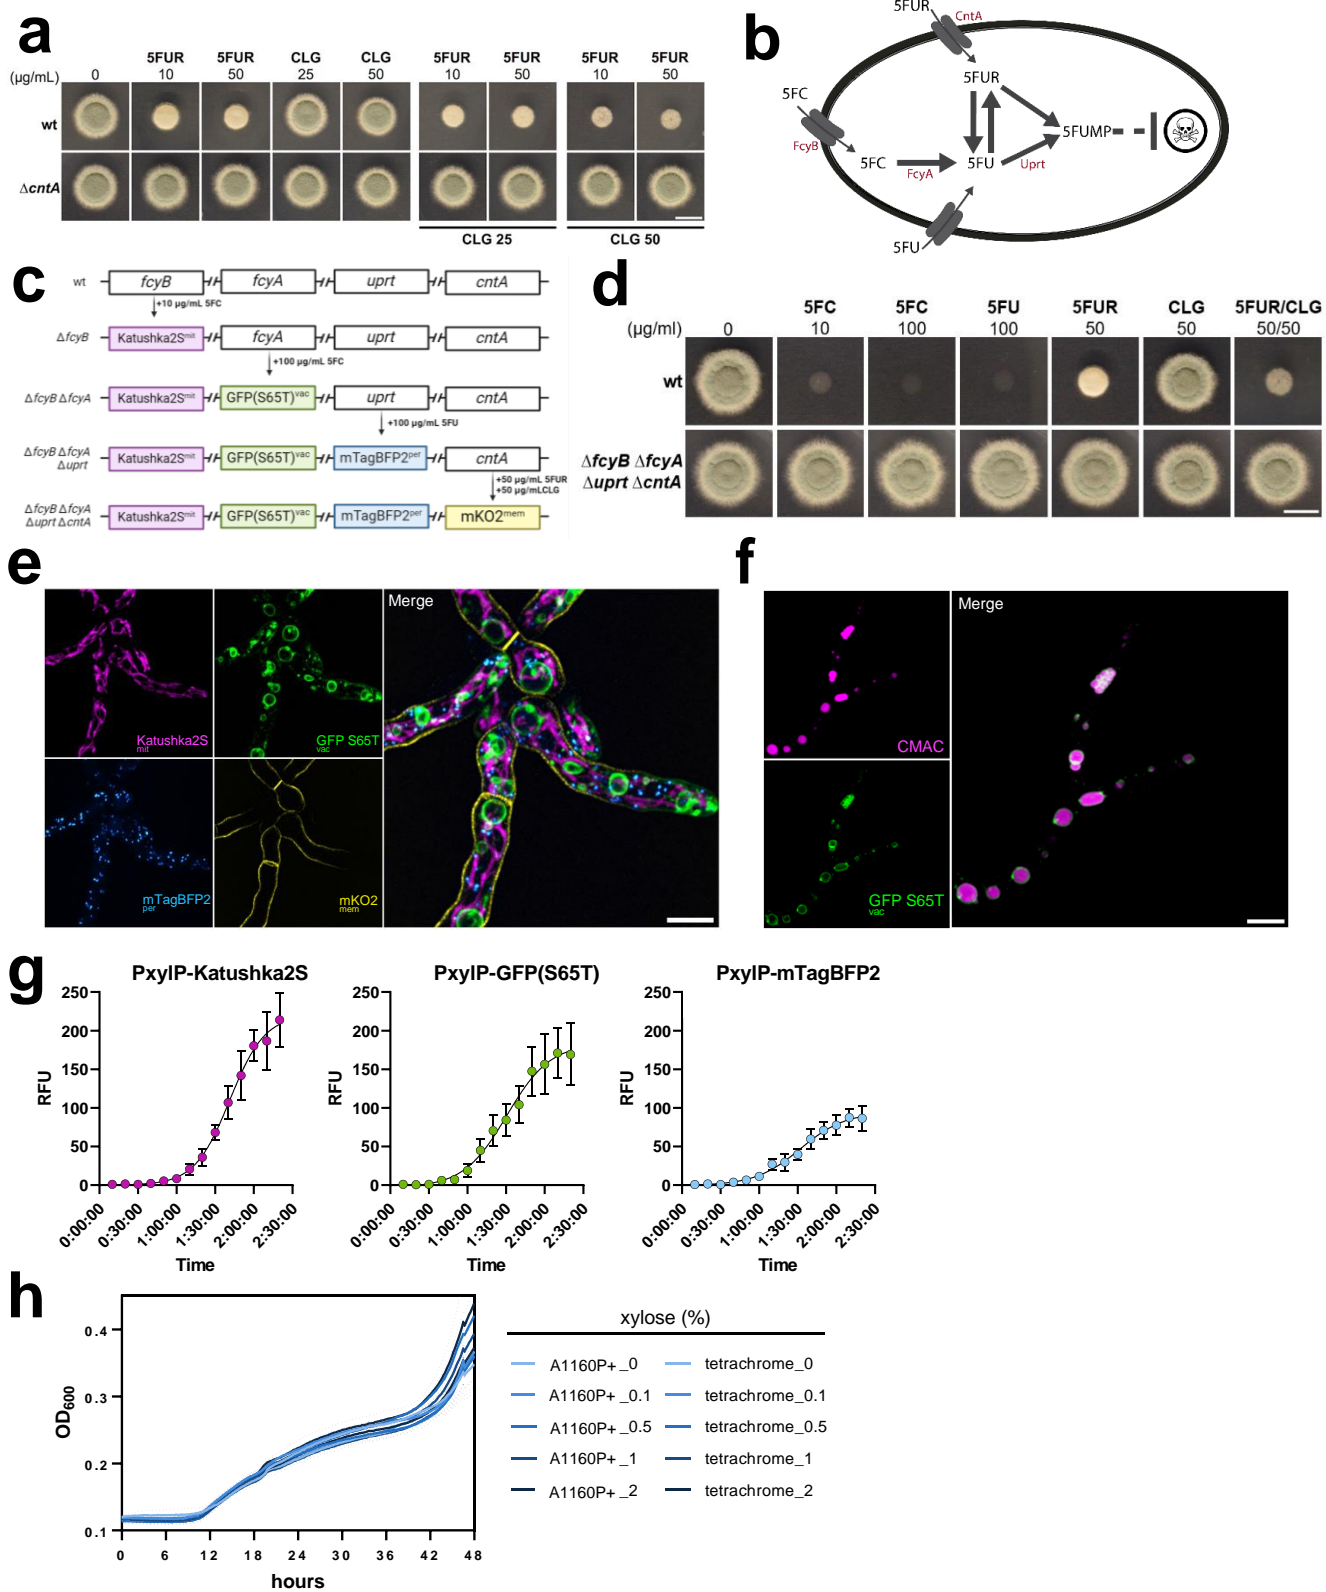

**Figure S3.** Conditional, xylose-inducible expression of distinct fluorophores. (a) Plate growth-based susceptibility testing of WT and  $\Delta cntA$  exposed to 5FUR and CLG. The strains were point inoculated on solid AMM pH 5 and incubated for 48 h at 37 °C. Scale bar: 1 cm. (b) Scheme illustrating *A. fumigatus* proteins involved in both the uptake and metabolism of 5-fluoropyrimidines through the pyrimidine salvage pathway. (c) The final strategy proposed to perform sequential counter-selection based on 5-fluoropyrimidine resistance. *fcyB*, *fcyA*, *uprt* and *cntA* genes are replaced with sequences encoding fluorescent-labelled subcellular markers. (d) Plate growth-based susceptibility testing of WT and the quadruple mutant. strains were point-inoculated on solid AMM pH 5 and incubated for 48 h. Scale bar, 1 cm. (e) Multicolour imaging of the tetrachrome strain. Scale bar: 5  $\mu$ m. (f) Determination of the subcellular localization of GFP S65T-Vam3 in *Aspergillus fumigatus*. GFP S65T-Vam3 surrounds with CMAC-labelled vacuoles. Scale bar: 5  $\mu$ m. (g) PxylP-driven expression of GFP S65T, mTagBFP2, and Katushka2S. *A. fumigatus* germlings were grown in RPMI-1640 for 18 hours at 30 °C and 1 hour at 37 °C. FP expression was induced by supplementing the medium with 1% xylose and cells were imaged in 10-minute intervals for 2.5 hours via confocal microscopy at 37 °C. FP brightness (RFU) was assessed via ImageJ for 10 germlings per strain. (h) Growth rates were calculated as the slope of growth between 12-18 hours. These were compared by a one-way ANOVA ( $F(9, 20)=0.7108$ , ns) ( $n=3$ ).

S4

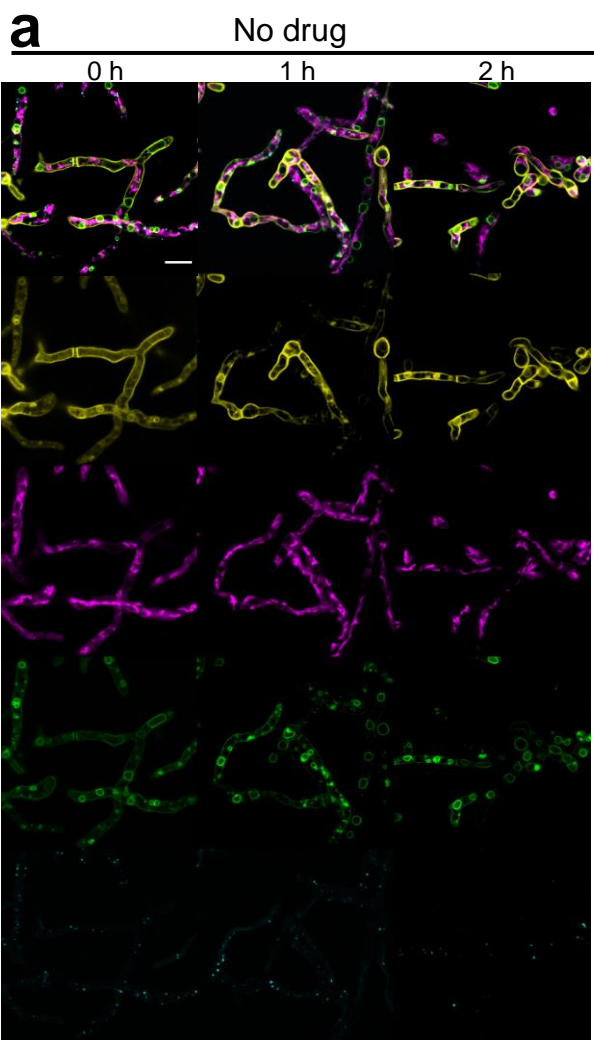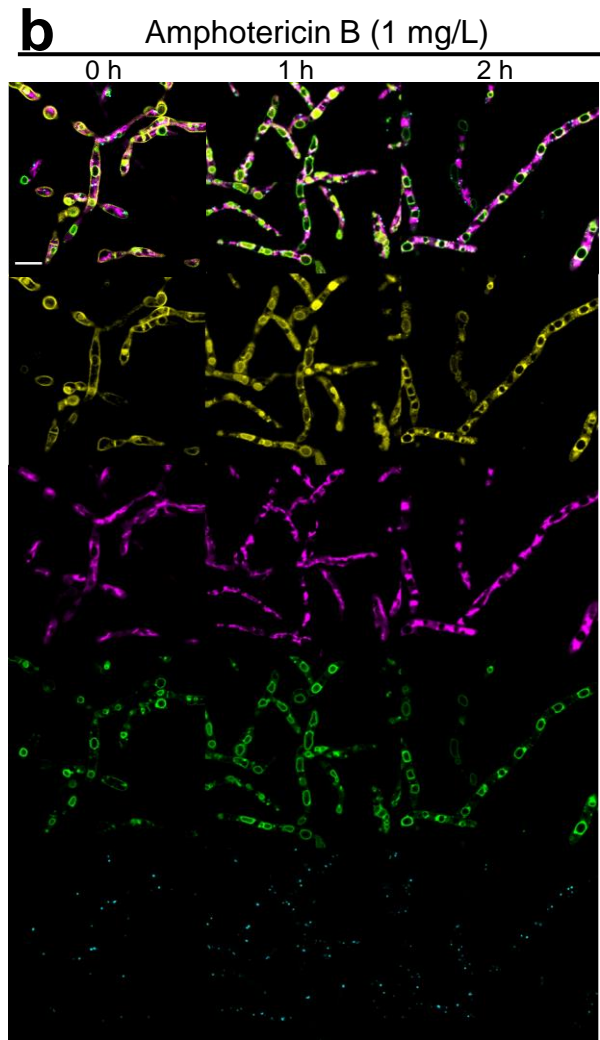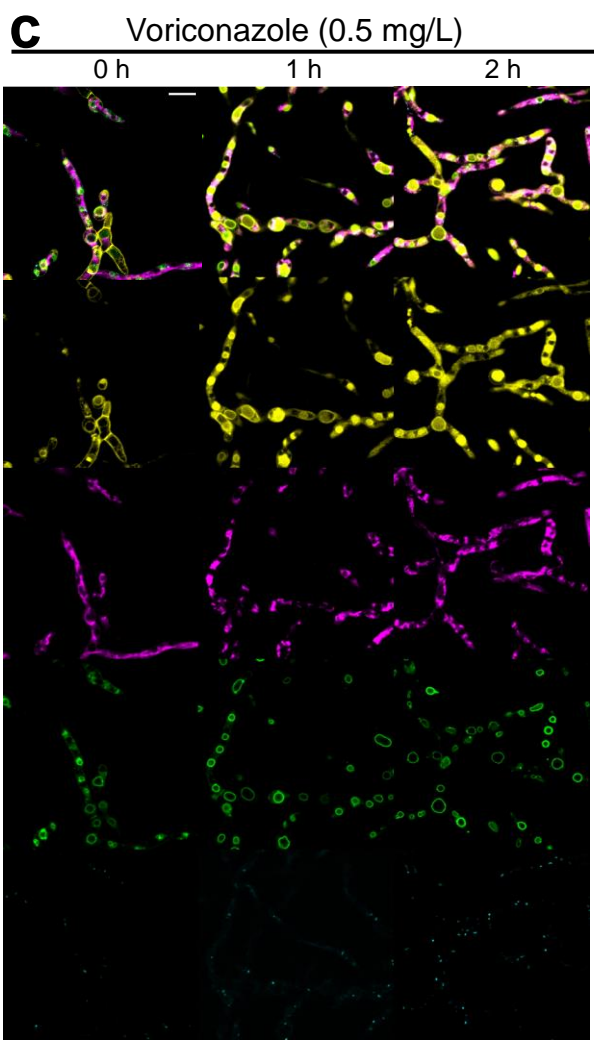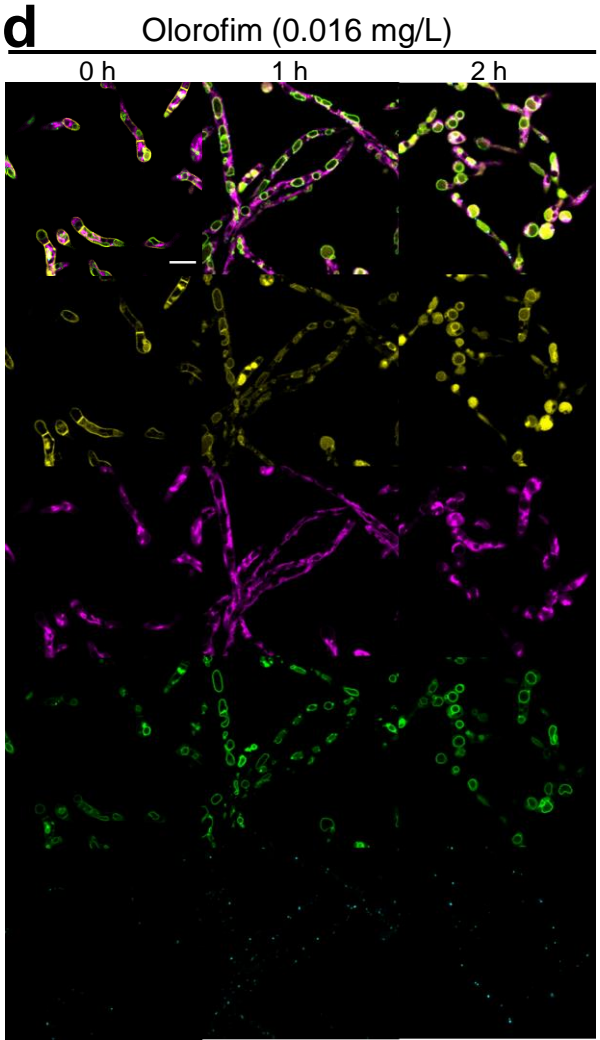



a

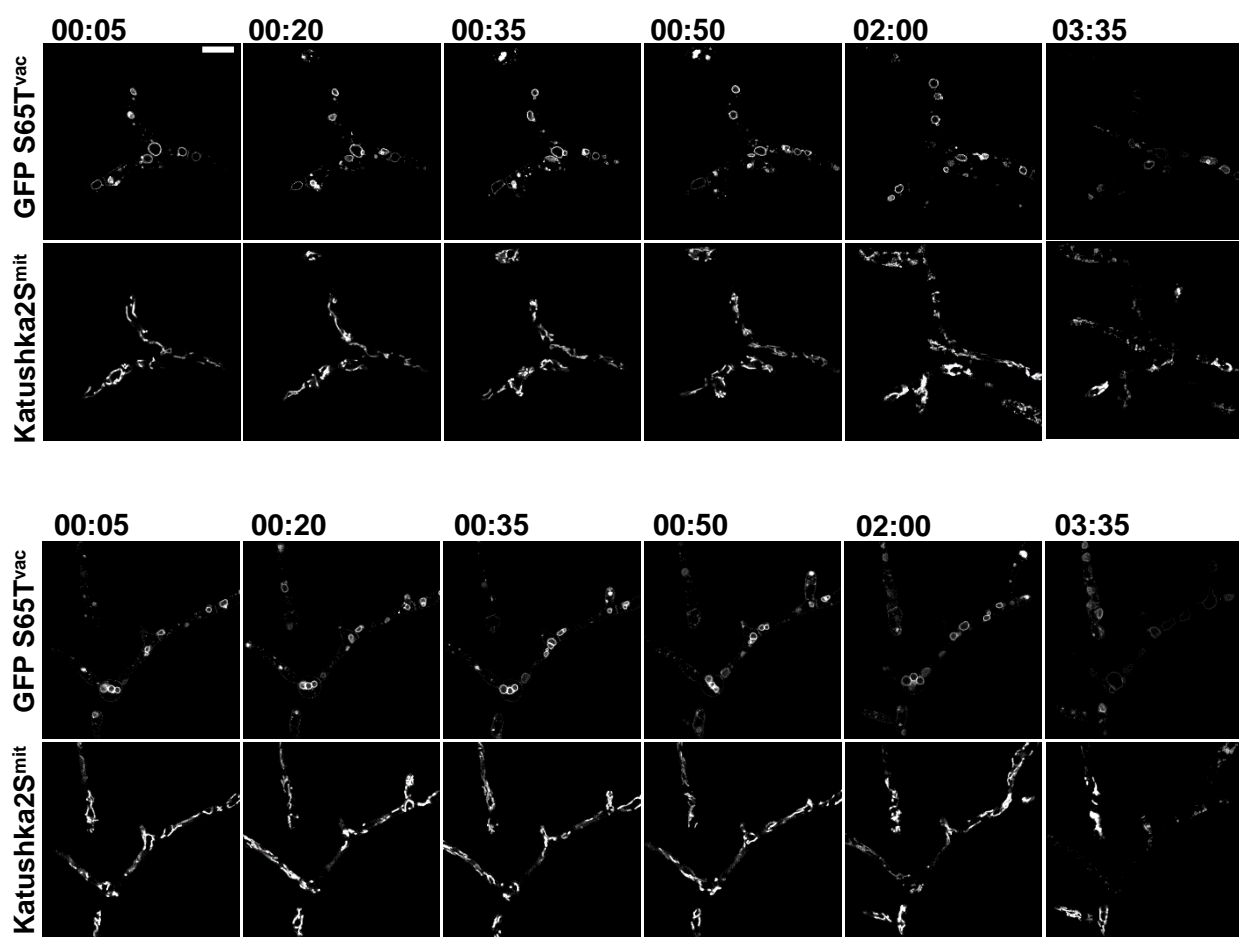

b

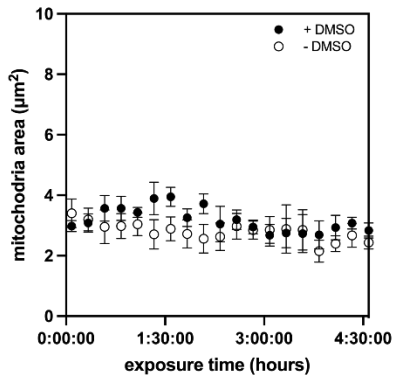

c

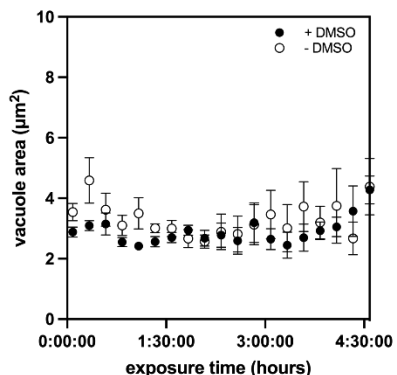

**Figure S5.** (a) Mitochondria and vacuoles in the tetrachrome strain with and without the addition of 0.01% DMSO. Scale bar, 10 μm. (b) There was no significant effect of time ( $t(3.42) = -2.003$ ,  $p = 0.1275$ ), DMSO ( $t(2.45) = -0.831$ ,  $p = 0.479$ ) or an interaction between the two ( $t(178.9) = 0.26$ ,  $p = 0.7953$ ) on the mitochondria fragment area. (c) There was no significant effect of time ( $t(23.16) = 1.679$ ,  $p = 0.10660$ ), DMSO ( $t(8.42) = 1.194$ ,  $p = 0.26491$ ) or an interaction between the two ( $t(180.6) = -1.403$ ,  $p = 0.16227$ ) on the vacuole area.
